# Supplementary material for: Targeted repositioning identifies drugs that increase fibroblast growth factor 20 production and protect against 6-hydroxydopamine-induced nigral cell loss in rats
Source: PubMed Central journal article supplement (PMC6554393; doi:10.1038/s41598-019-44803-1), 2019-06-06
Supplement: 41598_2019_44803_MOESM1_ESM.pdf [file 41598_2019_44803_MOESM1_ESM.pdf]

## Supplementary Information File

**Targeted repositioning identifies drugs that increase fibroblast growth factor 20 production and protect against 6-hydroxydopamine-induced nigral cell loss in rats.**

Edward J R Fletcher, Aran D Jamieson, Gareth Williams, Patrick Doherty and Susan Duty.

**Supplementary Table S1. Candidate drugs from the *in-silico* screen that did not progress to *in-vitro* screening.**

| Candidate                   | CMap rank | Expression rank | Class                                                      |
|-----------------------------|-----------|-----------------|------------------------------------------------------------|
| 6-azathymine                | 1         | 0.85            | anti-cancer compound                                       |
| cefsulodin                  | 4         | 0.7             | cephalosporin antibiotic                                   |
| ginkgolide A                | 7         | 0.66            | natural product; platelet aggregation inhibitor            |
| gramine                     | 8         | 0.66            | naturally occurring indole alkaloid; NA reuptake inhibitor |
| adipiodone                  | 11        | 0.63            | contrast medium                                            |
| corynanthine                | 12        | 0.63            | natural alkaloid                                           |
| cefalotin                   | 13        | 0.62            | cephalosporin antibiotic                                   |
| rimexolone                  | 14        | 0.6             | glucocorticoid                                             |
| flunixin                    | 15        | 0.59            | veterinary NSAID                                           |
| sulconazole                 | 16        | 0.59            | antifungal                                                 |
| clomipramine                | 17        | 0.58            | tricyclic antidepressant                                   |
| gelsemine                   | 20        | 0.57            | natural alkaloid                                           |
| omeprazole                  | 22        | 0.55            | proton pump inhibitor, gastric anti-acid                   |
| benzylpenicillin            | 23        | 0.53            | penicillin G                                               |
| methylbenzethonium chloride | 24        | 0.53            | antiseptic                                                 |
| thiabendazole               | 25        | 0.51            | fungicide, anthelmintic                                    |
| fluspirilene                | 26        | 0.5             | typical antipsychotic                                      |
| hecogenin                   | 27        | 0.49            | plant steroid                                              |
| ketanserin                  | 29        | 0.46            | antihypertensive                                           |
| dacarbazine                 | 31        | 0.44            | antineoplastic chemotherapeutic                            |
| pimozide                    | 32        | 0.43            | typical antipsychotic                                      |
| 0175029-0000                | 36        | 0.39            | cyclin-dependent kinase inhibitor                          |
| meclozine                   | 37        | 0.39            | antihistamine                                              |
| alexidine                   | 39        | 0.37            | antimicrobial                                              |
| meticrane                   | 40        | 0.36            | diuretic                                                   |
| bisacodyl                   | 41        | 0.35            | laxative                                                   |

The candidates are ranked based on the expression levels across the 1261 drugs in the CMap database. The relative expression rank of FGF20 in the individual CMap expression profiles are shown in the third column. All these drugs were rejected prior to *in-vitro* screening based on their inability to cross the blood-brain barrier or because they possessed contraindications or other undesirable side-effects for people with Parkinson's disease.

**Supplementary Figure S2. Astrocytes are a source of FGF20 production in the rat striatum**

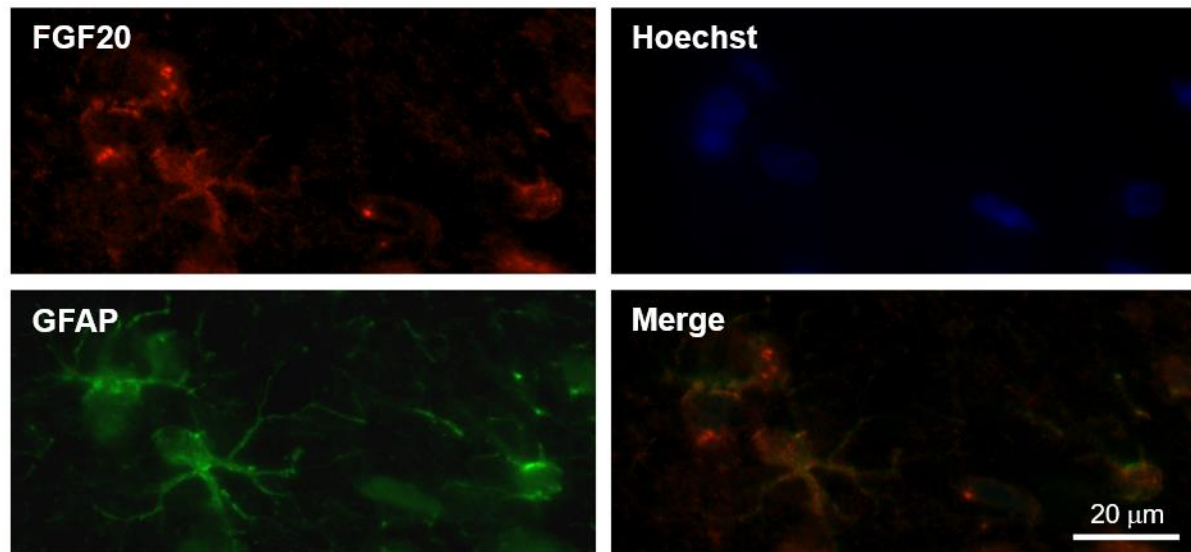

Fibroblast growth factor 20 (FGF20) co-localises with glial fibrillary acidic protein (GFAP) in naïve rat striatum indicating astrocytes as a source of FGF20 in this region.

Paraffin-embedded naïve adult rat brain sections (8 μm) were incubated with bovine serum albumin blocking buffer for 10min before being incubated with rabbit polyclonal anti-FGF20 primary antibody (abcam, ab198876, 1/200) and mouse polyclonal anti-GFAP primary antibody (abcam, ab7260, 1/500) overnight. Following TBS washes, the sections were incubated for 1 hour with goat anti-rabbit AlexaFluor 594 (1/750) and goat anti-mouse AlexaFluor 488 (1/750). Nuclei were stained with hoechst 33342. All steps were carried out at room temperature.

Images were obtained at 20x magnification using a Zeiss Apotome fluorescent microscope and Axiovision software.
